# Supplementary material for: A comprehensive study on lithium-based reactive hydride composite (Li-RHC) as a reversible solid-state hydrogen storage system toward potential mobile applications
Source: PubMed Central journal article supplement (PMC9034372; doi:10.1039/d1ra03246a), 2021-06-30
Supplement: RA-011-D1RA03246A-s001.pdf [file RA-011-D1RA03246A-s001.pdf]

## Electronic Supplementary Information

### **A comprehensive study on Lithium-based reactive hydride composite (Li-RHC) as a reversible solid-state hydrogen storage system toward potential mobile applications**

Fahim Karimi,<sup>\*a</sup> Philipp Klaus Pranzas,<sup>a</sup> Julián Atilio Puszkiel,<sup>c,a</sup> María Victoria Castro Riglos,<sup>b</sup> Chiara Milanese,<sup>d</sup> Ulla Vainio,<sup>e</sup> Claudio Pistidda,<sup>a</sup> Goekhan Gizier,<sup>a</sup> Thomas Klassen,<sup>a</sup> Andreas Schreyer,<sup>f</sup> and Martin Dornheim<sup>a</sup>

<sup>a</sup>Department of Nanotechnology, Institute of Materials Research, Helmholtz-Zentrum Geesthacht, Max-Planck-Straße 1, 21502 Geesthacht, Germany. Address here.

<sup>b</sup>Department of Metalphysics, Consejo Nacional de Investigaciones Científicas y Técnicas (CONICET) y Centro Atómico Bariloche, Av. Bustillo km 9500 S.C. de Bariloche, Argentina.

<sup>c</sup>Department of Physicochemistry of Materials, Consejo Nacional de Investigaciones Científicas y Técnicas (CONICET) y Centro Atómico Bariloche, Av. Bustillo km 9500 S.C. de Bariloche, Argentina.

<sup>d</sup>C.S.G.I. & Department of Chemistry, Physical Chemistry Section, University of Pavia, Viale Taramelli 16 - 27100 Pavia- ITALY.

<sup>e</sup>Hitachi High-Tech Analytical Science Finland, Finland

<sup>f</sup>European Spallation Source ERIC Box 176 S-22100 Lund, Sweden.

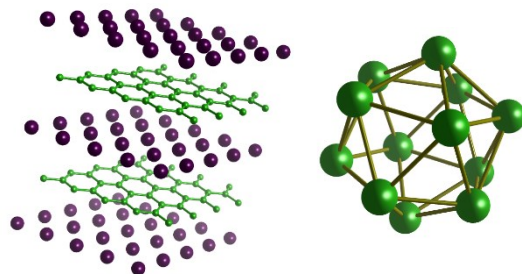

**Figure S1.** a) Layered structure of  $\text{MgB}_2$  and b) Closo-structure of Boron Crystal structure.

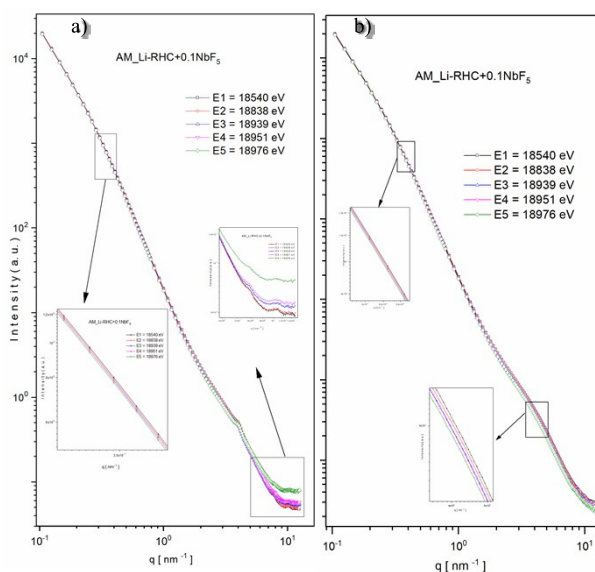

**Figure S2.** a) ASAXS curves collected at six energies close to the K-absorption edge of Nb (18.9 keV) b) ASAXS curves corrected for Kapton and incoherent scattering.

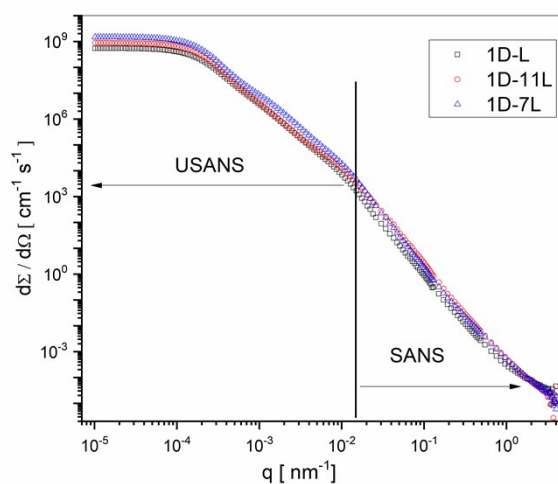

**Figure S3.** Merged SANS/USANS curves of pure  $2\text{LiBH}_4+\text{MgH}_2$  with different isotopes after the first desorption.

**Fitting model**

For the SAXS/ASAXS and SANS/USANS scattering curves spherical particle distribution is assumed. The form factor of a sphere is given by:

$$F(q, r, \Delta\eta(E)) = 3\Delta\eta(E) \frac{\sin(qr) - qr \cos(qr)}{(qr)^3} \quad (1)$$

and the size distribution of the spheres are assumed to be log-normal:

$$N(r) = \frac{1}{(2\pi)^2 r \sigma} \exp\left(-\ln\left(\frac{r}{\mu}\right)^2 / 2\sigma^2\right) \quad (2)$$

**Table S1.** Kinetic models for fitting the volumetric measurements of pure- and doped Li-RHC.<sup>1-3</sup>

| Equation of the model                             | Model description                                                                                              |
|---------------------------------------------------|----------------------------------------------------------------------------------------------------------------|
| $\alpha(t) = kt$                                  | Chemisorption/recombination on the particle surface is the rate-limiting step.                                 |
| $[-\ln(1 - \alpha(t))^{1/2}] = kt$                | 2-dimensional growth of existing nuclei with constant interface velocity (2D-KJMA).                            |
| $[-\ln(1 - \alpha(t))^{1/3}] = kt$                | 3-dimensional growth of existing nuclei with constant interface velocity (3D-KJMA).                            |
| $[-\ln(1 - \alpha(t))^{2/3}] = kt$                | Diffusion controlled 3-dimensional growth of existing nuclei with decreasing interface velocity (DC: 3D-KJMA). |
| $1 - (1 - \alpha(t))^{1/2} = kt$                  | 2-dimensional growth of contracting volume with constant interface velocity (2D-CV).                           |
| $1 - (1 - \alpha(t))^{1/3} = kt$                  | 3-dimensional growth of contracting volume with constant interface velocity (3D-CV).                           |
| $1 - (2\alpha(t)/3) - (1 - \alpha(t))^{2/3} = kt$ | Diffusion controlled 3-dimensional growth of contracting volume with constant interface velocity (DC: 3D-CV).  |

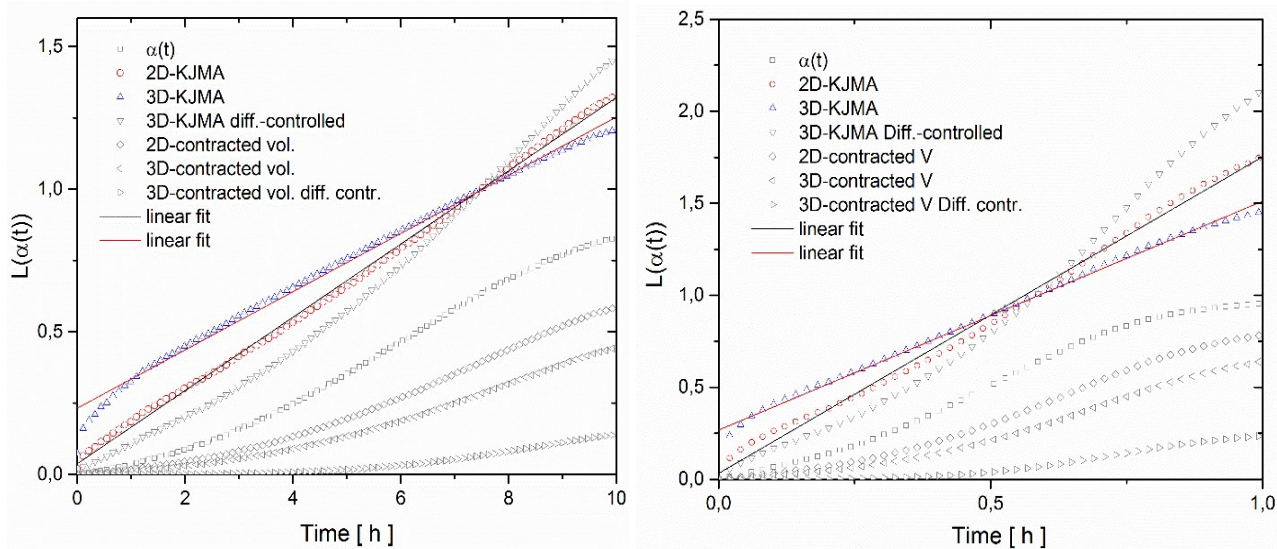

**Figure S4.** Kinetic models for the first desorption of a) pure Li-RHC and b) doped Li-RHC with the corresponding best fits.

## References

1. M. Avrami, *The Journal of Chemical Physics*, 1939, **7**, 1103-1112.
2. M. Avrami, *The Journal of Chemical Physics*, 1940, **8**, 212-224.
3. M. Avrami, *The Journal of Chemical Physics*, 1941, **9**, 177-184.
